# Supplementary material
Source: PubMed Central journal article supplement (PMC6646001)
Supplement: ao8b00683_si_001.pdf [file ao8b00683_si_001.pdf]

Supporting information

# Chemically modified gellan gum hydrogels with tunable properties for use as tissue engineering scaffolds

*Zihao Xu<sup>1</sup>, Zhuqing Li<sup>1</sup>, Shan Jiang<sup>1</sup>, and Kaitlin M. Bratlie<sup>1,2,3,\*</sup>*

<sup>1</sup>Department of Materials Science & Engineering, Iowa State University, Ames, Iowa 50011

<sup>2</sup>Department of Chemical & Biological Engineering, Iowa State University, Ames, Iowa 50011

<sup>3</sup>Division of Materials Science & Engineering, Ames National Laboratory, Ames, Iowa 50011

CORRESPONDING AUTHOR FOOTNOTE

\*To whom correspondence should be addressed: Tel: 515-294-7304, Fax: 515-294-5444, E-mail:

[kbratlie@iastate.edu](mailto:kbratlie@iastate.edu)

## 1. Methods and materials

### 1.1. Molecular weight measurement

The molecular weight of gellan gum (GG), low modified gellan gum (LMGG) and high modified gellan gum (HMGG) were extrapolated by intrinsic viscosity measurements using the Mark-Houwink relationship:

$$[\eta]=K(M_v)^\alpha \quad (1)$$

where  $[\eta]$  is intrinsic viscosity of the polymer,  $K$  and  $\alpha$  are the Mark-Houwink constants for a given polymer-solvent system, and  $M_v$  is viscosity average molecular weight of the polymer. Based on a previous report,  $K$  and  $\alpha$  for aqueous gellan gum are  $7.48 \times 10^{-5}$  L/g and 0.91, respectively[1].

The intrinsic viscosities of GG, LMGG, and HMGG were extrapolated via equation 2 through measuring relative viscosity  $\eta_r$  and specific viscosity  $\eta_{sp}$  at a series of polymer concentration by U-tube viscometer.

$$[\eta]=\lim_{C \rightarrow 0} \eta_{sp}=\lim_{C \rightarrow 0} \ln \eta_r / C \quad (2)$$

where  $\eta_r$  is measured directly by comparing the elution time of pure solvent water and aqueous gellan gum. The viscosity of a polymer-solvent can be approximated as

$$\eta = A\rho t \quad (3)$$

where  $t$  is the elution time,  $\rho$  is the density of the polymer-solvent, and  $A$  is a constant of the viscometry. Therefore,  $\eta_r$  can be approximated using equation 4:

$$\eta_r = \frac{t}{t_0} \quad (4)$$

where  $t_0$  is the elution time of pure solvent and  $t$  is elution time of the polymer-solvent.  $\eta_{sp}$  was calculated using the relative relationship between  $\eta_r$  and  $\eta_{sp}$ :

$$\eta_{sp}=\eta_r-1 \quad (5)$$

Using the above theory, a series of concentrations of GG, LMGG, and HMGG were prepared and the elution time were measured with a U-tube viscometer. For each type of gellan gum,  $\frac{\eta_{sp}}{c} - C$  and  $\frac{\ln \eta_r}{c} - C$  were plotted. Two obtained lines should have the same y-intercept, which is  $[\eta]$ . The viscosity average molecular weight was calculated using the above mentioned K and  $\alpha$  constants. The results are shown in **Figure S1**.

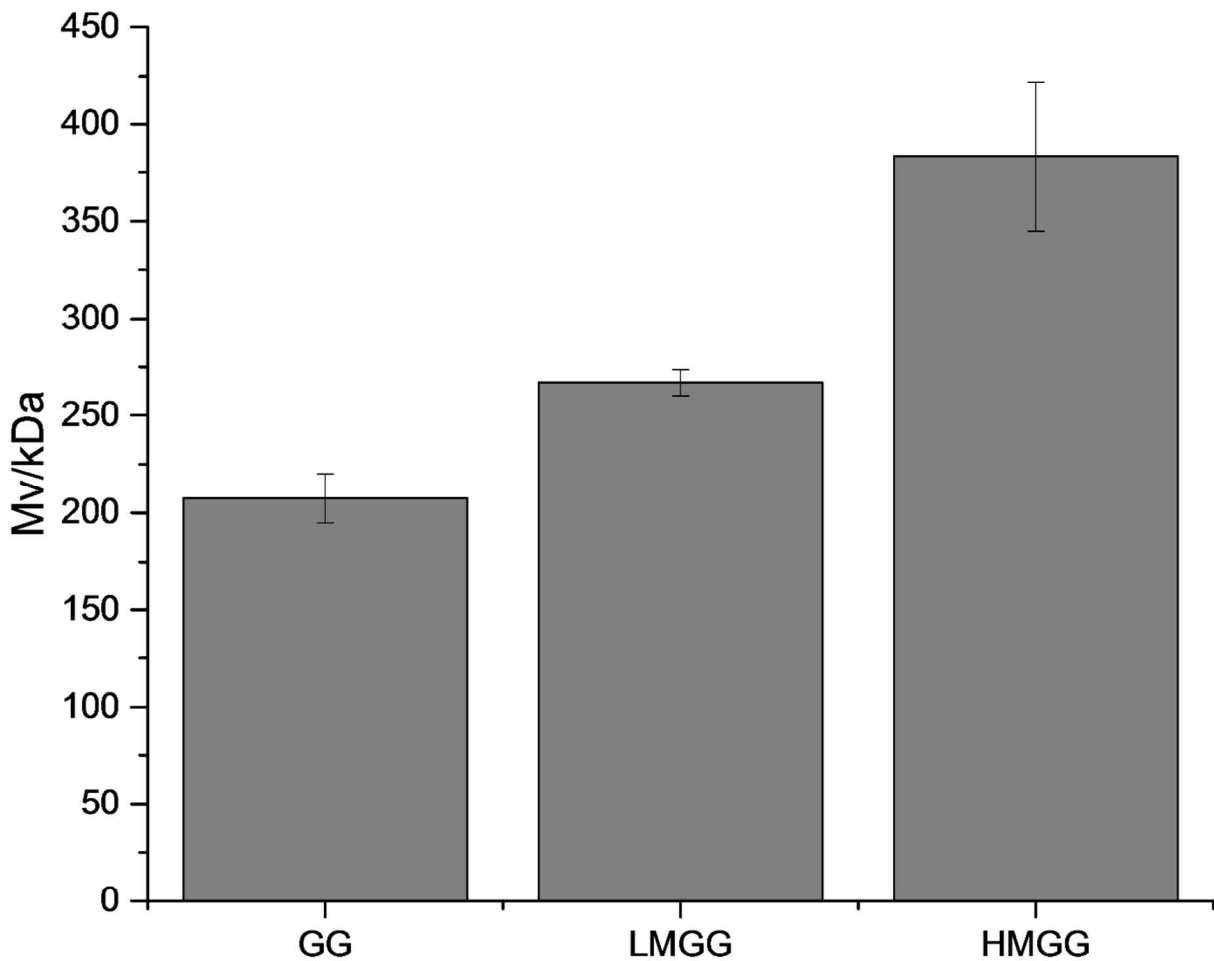

**Figure S1.** Viscosity average molecular weight of GG, LMGG and HMGG.

## Reference

1. Dreveton, E., Monot, F., Lecourtier, J., Ballerini, D., and Choplin, L. “**Influence of Fermentation Hydrodynamics on Gellan Gum Physico-Chemical Characteristics**” *Journal of Fermentation and Bioengineering* 82, no. 3 (1996): 272–276. doi:10.1016/0922-338X(96)88819-2
